# Supplementary material
Source: MDPI journal article supplement (https://www.mdpi.com/2313-0105/9/3/168)
Supplement: s1 [file s1]

# **The role of the precursor on the electrochemical performance of N,S co-doped graphene electrodes in aqueous electrolytes**

Rodrigo Braga <sup>a,\*</sup>, Diana M. Fernandes <sup>b</sup>, Alberto Adán-Más <sup>a</sup>, Teresa M. Silva <sup>a, c</sup>,  
Fátima Montemor <sup>a,\*</sup>

<sup>a</sup>Centro de Química Estrutural-CQE, Institute of Molecular Sciences, Departamento Engenharia Química,

Instituto Superior Técnico, Universidade de Lisboa, 1049-001 Lisboa, Portugal;

<sup>b</sup>REQUIMTE-LAQV/Departamento de Química e Bioquímica, Faculdade de Ciências, Universidade do Porto, 4169-007 Porto, Portugal.

<sup>c</sup>Departamento de Engenharia Mecânica, GI-MOSM, Instituto Superior de Engenharia de Lisboa—ISEL, 1950-062 Lisboa, Portugal

## Content

### Electrochemical Performance

- 1 M Na<sub>2</sub>SO<sub>4</sub> electrolyte

In sequence, the electrochemical measurements of S<sub>3</sub>N<sub>3</sub>-GF (25:75) were performed as shown in Figure S1. The cyclic voltammetry presented in Figure S1 (a) S<sub>3</sub>N<sub>3</sub>-GF (25:75) – 1 M Na<sub>2</sub>SO<sub>4</sub> (-0.15 V to 1.0 V vs. SCE) evidenced an enlarged working potential window for GCDs, as plotted in Figure S1 (b).

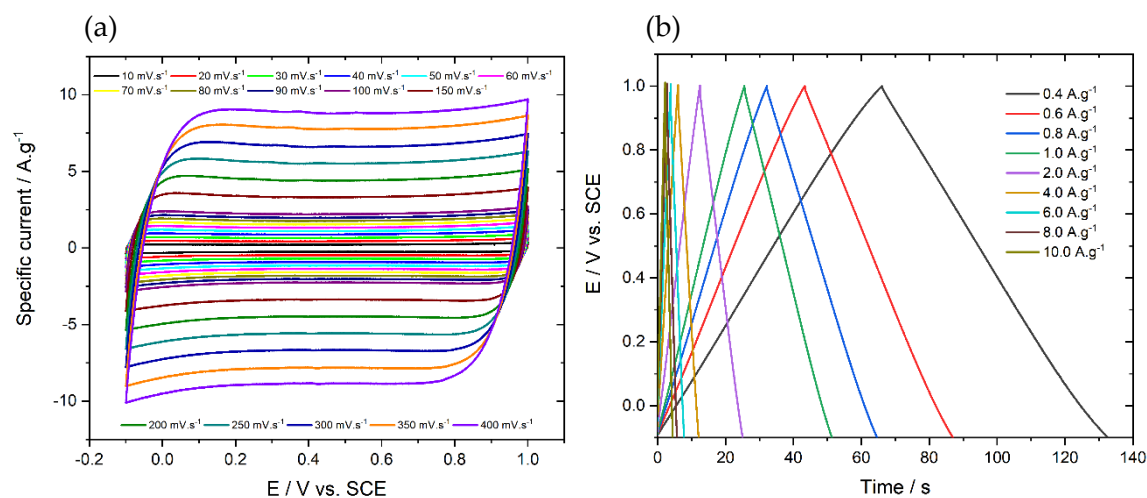

**Figure S1.** S<sub>3</sub>N<sub>3</sub>-GF (25:75): a) cyclic voltammetry at different scan rates ranging from 10 mV.s<sup>-1</sup> to 400 mV.s<sup>-1</sup>. Potential window from -0.15 V to 1.0 V vs. SCE (1 M Na<sub>2</sub>SO<sub>4</sub>) electrolytes; b) galvanostatic charge–discharge at different applied specific currents from 0.4 to 10 A.g<sup>-1</sup> in 1 M Na<sub>2</sub>SO<sub>4</sub> electrolyte.

The S<sub>3</sub>N<sub>2</sub>-GF (25:75) results are presented in Figure S2. The cyclic voltammetry and charge–discharge responses are plotted in Figure S2 (a), and (b) for 1 M Na<sub>2</sub>SO<sub>4</sub> (0.0 V to 1.0 V vs. SCE), respectively.

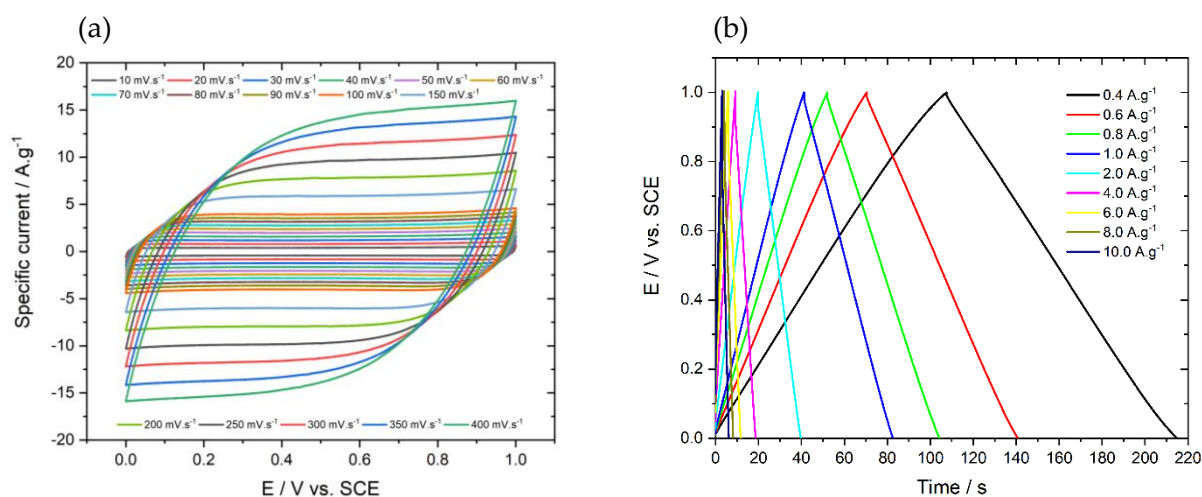

**Figure S2.** S<sub>3</sub>N<sub>2</sub>-GF (25:75): a) cyclic voltammetry at different scan rates ranging from 10 mV.s<sup>-1</sup> to 400 mV.s<sup>-1</sup>. Potential window from 0.0 V to 1.0 V vs. SCE in 1 M Na<sub>2</sub>SO<sub>4</sub> electrolyte; b) galvanostatic charge-discharge at different applied specific currents from 0.4 to 10 A.g<sup>-1</sup> in 1 M Na<sub>2</sub>SO<sub>4</sub> electrolytes.

### 1 M KOH electrolyte

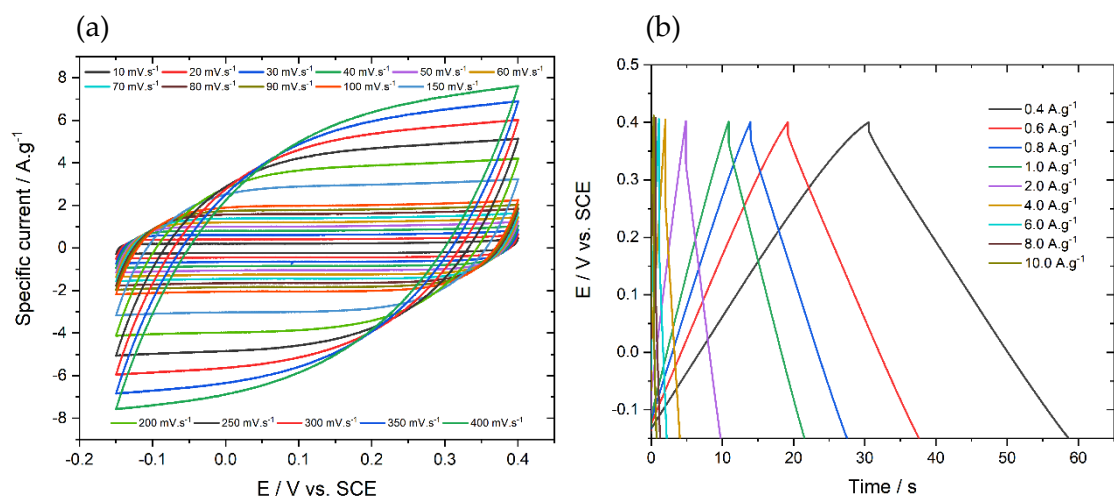

**Figure S3.** SN<sub>6</sub>-GF (25:75): a) cyclic voltammetry at different scan rates ranging from 10 mV.s<sup>-1</sup> to 400 mV.s<sup>-1</sup>. Potential window from -0.15 V to 0.4 V vs. SCE in 1 M KOH electrolyte; b) galvanostatic charge-discharge at different applied specific currents from 0.4 to 10 A.g<sup>-1</sup> in 1 M KOH electrolyte.

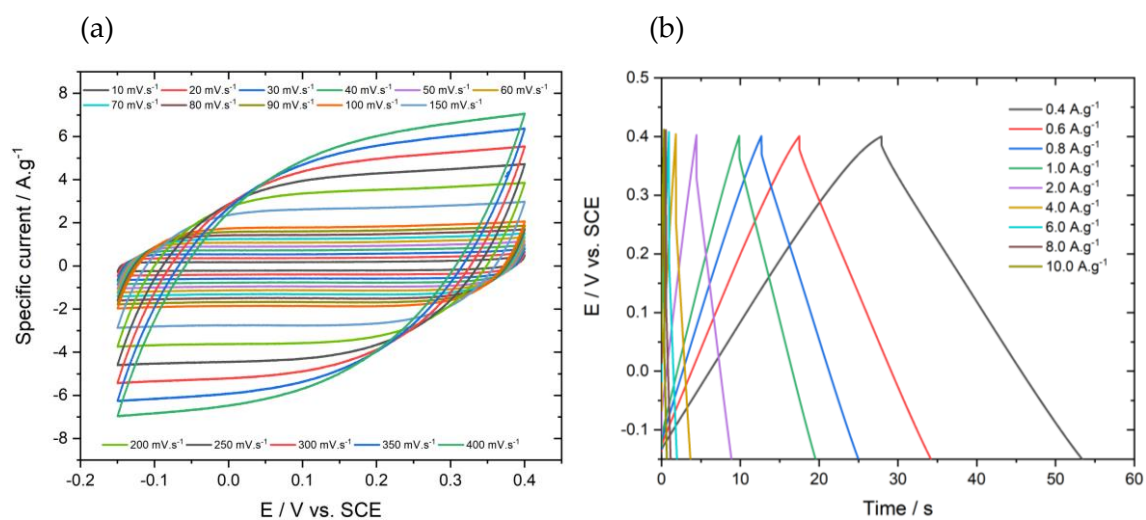

**Figure S4.** S<sub>3</sub>N<sub>3</sub>-GF (25:75): a) cyclic voltammetry at different scan rates ranging from 10 mV.s<sup>-1</sup> to 400 mV.s<sup>-1</sup>. Potential window from -0.15 V to 0.4 V vs. SCE in 1 M KOH electrolyte; b) galvanostatic charge-discharge at different applied specific currents from 0.4 to 10 A.g<sup>-1</sup> in 1 M KOH electrolyte.

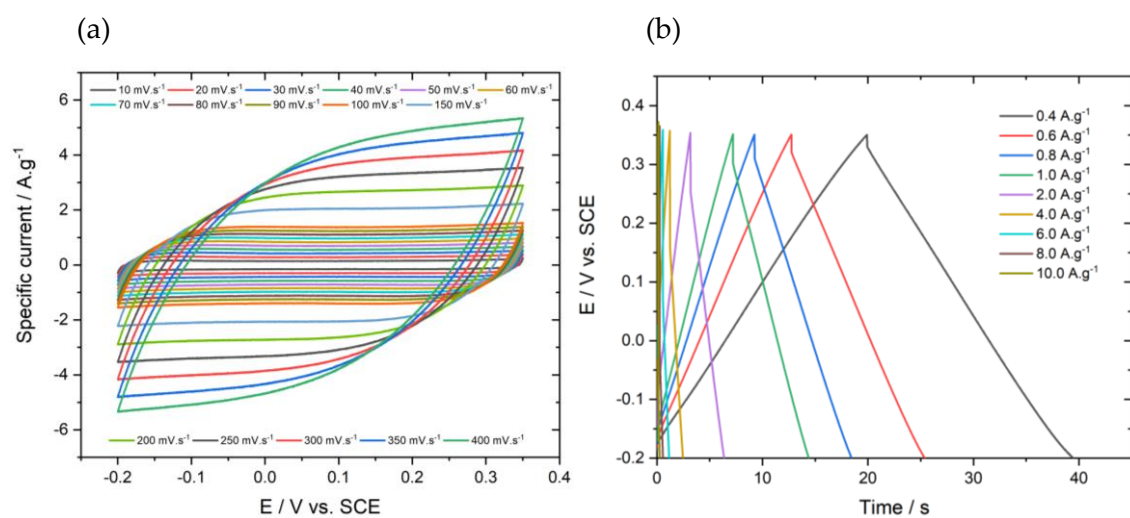

**Figure S5.** S<sub>3</sub>N<sub>2</sub>-GF (25:75): a) cyclic voltammetry at different scan rates ranging from 10 mV.s<sup>-1</sup> to 400 mV.s<sup>-1</sup>. Potential window from -0.15 V to 0.4 V vs. SCE in 1 M KOH electrolyte; b) galvanostatic charge-discharge at different applied specific currents from 0.4 to 10 A.g<sup>-1</sup> in 1 M KOH electrolyte.
